# Supplementary material for: Direct patient costs of maternal care and birth-related complications at faith-based hospitals in Madagascar: a secondary analysis of programme data using patient invoices
Source: HighWire-hosted journal article supplement (doi:10.1136/bmjopen-2021-053823), 2022-04-01
Supplement: bmjopen-2021-053823supp001_data_supplement.pdf [file bmjopen-2021-053823supp001_data_supplement.pdf]

**SUPPLEMENTARY MATERIAL**

**Supplementary Table 1.** List of ICD-10 blocks and categories used to code admission diagnoses from patient invoices and medical records.

---

|              |                                                                                             |
|--------------|---------------------------------------------------------------------------------------------|
| ICD 060-075  | Complications of labour and delivery                                                        |
| ICD 080-084  | Delivery                                                                                    |
| ICD 030-048  | Maternal care related to the foetus and amniotic cavity and possible delivery problems      |
| ICD 000-080  | Pregnancies with abortive outcomes                                                          |
| ICD 010-016: | Oedema, proteinuria and hypertensive disorders in pregnancy, childbirth, and the puerperium |
| ICD 085-092  | Complications predominantly related to the puerperium                                       |
| ICD 020-029  | Other disorders predominantly related to pregnancy                                          |

---

**Supplementary Table 2.** List of procedures performed at the study hospitals during the study period according to Systematized Nomenclature of Medicine Clinical Terms (SNOMED CT, version 2020-07-31).

---

|           |                               |
|-----------|-------------------------------|
| 11466000  | C-section                     |
| 177184002 | Spontaneous vaginal delivery  |
| 450669005 | Excision of adnexa of uterus  |
| 236958009 | Induction of labour           |
| 11401008  | Dilatation and curettage      |
| 74770008  | Laparotomy                    |
| 61586001  | Delivery by vacuum extraction |
| 287664005 | Bilateral tubal ligation      |
| 177222006 | Suture of episiotomy          |
| 116859006 | Blood transfusion             |
| 236886002 | Hysterectomy                  |
| 237311001 | Breech delivery               |
| 237312008 | Twin delivery                 |
| 278296000 | Drainage of pleural cavity    |
| 25353009  | Craniotomy                    |

---

**Supplementary Table 3.** Frequencies and percentages of ICD chapter blocks and pertaining diagnoses at the study hospitals during the study period, n=890.

| <b>ICD chapter block and pertaining diagnoses</b>                                                 | <b>Frequency</b> | <b>Percentage</b> |
|---------------------------------------------------------------------------------------------------|------------------|-------------------|
| <b>Complications of labour and delivery</b>                                                       | <b>346</b>       | <b>38.9</b>       |
| Obstructed labour                                                                                 | 208              | 23.4              |
| Placenta retention                                                                                | 32               | 3.6               |
| Prolonged labour                                                                                  | 27               | 3.0               |
| Foetal distress                                                                                   | 20               | 2.3               |
| Uterus rupture                                                                                    | 20               | 2.3               |
| Premature labour                                                                                  | 15               | 1.7               |
| Postpartum haemorrhage                                                                            | 9                | 1.0               |
| Prolapse of umbilical cord                                                                        | 8                | 0.9               |
| Prolapse of extremity                                                                             | 7                | 0.8               |
| <b>Encounter for delivery</b>                                                                     | <b>187</b>       | <b>21</b>         |
| Single spontaneous delivery                                                                       | 171              | 19.2              |
| Breech delivery                                                                                   | 10               | 1.1               |
| Twin delivery                                                                                     | 6                | 0.7               |
| <b>Pregnancy with abortive outcome</b>                                                            | <b>113</b>       | <b>12.7</b>       |
| Extrauterine gravidity                                                                            | 57               | 6.4               |
| Abortion (all forms but imminent)                                                                 | 34               | 3.8               |
| Imminent abortion                                                                                 | 13               | 1.5               |
| Molar pregnancy                                                                                   | 9                | 1.0               |
| <b>Maternal care related to the foetus and amniotic cavity and possible delivery problems</b>     | <b>84</b>        | <b>9.4</b>        |
| Intrauterine foetal death                                                                         | 43               | 4.8               |
| Placenta praevia                                                                                  | 23               | 2.6               |
| Retroplacental haematoma                                                                          | 18               | 2.0               |
| <b>Oedema, proteinuria and hypertensive disorders in pregnancy, childbirth and the puerperium</b> | <b>24</b>        | <b>2.7</b>        |

|                                                                    |            |             |
|--------------------------------------------------------------------|------------|-------------|
| Eclampsia                                                          | 24         | 2.7         |
| <b>Complications predominantly related to the puerperium</b>       | <b>18</b>  | <b>2.0</b>  |
| Infection postpartum                                               | 18         | 2.0         |
| <b>Other maternal disorders predominantly related to pregnancy</b> | <b>8</b>   | <b>0.9</b>  |
| Bleeding during pregnancy                                          | 8          | 0.9         |
| <b>Other</b>                                                       | <b>110</b> | <b>12.4</b> |
| Malaria during pregnancy                                           | 22         | 2.5         |
| Infection during pregnancy                                         | 16         | 1.8         |
| Gastritis during pregnancy                                         | 9          | 1.0         |
| Anaemia during pregnancy                                           | 9          | 1.0         |
| Other                                                              | 54         | 5.6         |
